# Supplementary material
Source: HighWire-hosted journal article supplement (https://bmjopen.bmj.com/content/15/1/e088616)
Supplement: inline-supplementary-material-1 [file inline-supplementary-material-1.pdf]

| Database                    | Search terms to be used and Boolean operators                                                                                                                                                                                                                                                                                                                                                                                                                                                                                                                                                                                                                                                                                                                                                                                                                                                                                                                                                                                                                                                                                                                                                                                                                  | Number of records identified in the initial search |
|-----------------------------|----------------------------------------------------------------------------------------------------------------------------------------------------------------------------------------------------------------------------------------------------------------------------------------------------------------------------------------------------------------------------------------------------------------------------------------------------------------------------------------------------------------------------------------------------------------------------------------------------------------------------------------------------------------------------------------------------------------------------------------------------------------------------------------------------------------------------------------------------------------------------------------------------------------------------------------------------------------------------------------------------------------------------------------------------------------------------------------------------------------------------------------------------------------------------------------------------------------------------------------------------------------|----------------------------------------------------|
| <b>Medline (EBSCO host)</b> | Parkinsonian disorders <b>AND</b> Tele* OR Telemedicine OR Telehealth OR Telemonitoring OR Telepractice OR Telenursing OR Telecare <b>AND</b> Self* OR Behavior change OR Behavior Modification <sup>†</sup>                                                                                                                                                                                                                                                                                                                                                                                                                                                                                                                                                                                                                                                                                                                                                                                                                                                                                                                                                                                                                                                   | <b>9, 875</b>                                      |
| <b>PsycINFO</b>             | ((Parkin* AND PEER (yes)) OR ((Parkinson disease) AND PEER (yes) OR ((Parkinsons disease) AND PEER (yes)) OR ((Parkinson's disease) AND PEER (yes)) OR ((Movement disorders) AND PEER (yes)) OR ((alpha synuclein) AND PEER (yes)) <b>AND</b> Technology AND PEER ((yes) OR ((Health technology) AND PEER ((yes) OR (Tele*AND PEER ((yes) OR (Telehealth AND PEER (yes)) OR (Telemedicine AND PEER ((yes) OR (Telemetry AND PEER (yes)) OR Sensors AND PEER (yes)) OR Wearables AND PEER (yes)) OR ((Assistive technology) AND PEER (yes)) OR ((Home based care) AND PEER (Yes)) OR ((Home-based care) AND PEER (yes)) OR ((IoT AND PEER (yes)) OR ((Internet of things) AND PEER (yes)) OR ((Virtual consultations) AND PEER (yes)) OR ((Video Consultations) AND PEER (yes))) <b>AND</b> ((Behav* AND PEER (yes)) OR Behavior AND PEER (Yes)) OR Behaviour AND PEER (yes)) OR ((Behavior Change) AND PEER (yes)) OR ((Behavior modification) AND PEER (yes)) OR (Self* AND PEER (yes)) OR ((Self Concept) AND PEER (yes)) OR ((Self efficacy) AND PEER (yes)) OR (AND PEER (yes)) OR (Self-efficacy AND PEER (yes)) OR (Self-management AND PEER (yes)) OR Rehabilitation AND PEER (yes)) OR (Resilience AND PEER (yes)) AND (La.exact(ENG*) AND PEER (yes)) | <b>1, 576</b>                                      |
| <b>CINAHL</b>               | MW (Parkinson's disease or Parkinson disease or pd or parkinsonism) <b>OR</b> SU Movement disorders <b>OR</b> MW Parkinsonian disorders <b>OR</b> TI Parkinson disease <b>AND</b> (telehealth or telemedicine or telemonitoring or telepractice or telecare) <b>OR</b> MW technology in healthcare <b>OR</b> MW digital technology <b>AND</b> TX (Self-efficacy or self efficacy or confidence or self esteem) <b>OR</b> TX self concept <b>OR</b> (self-management or self-care or self-regulation or self-monitoring) <b>OR</b> MW (Behavior change or Behavior modification)                                                                                                                                                                                                                                                                                                                                                                                                                                                                                                                                                                                                                                                                                | <b>3, 891</b>                                      |

|                       |                                                                                                                                                                                                                                                                                                                                                                                                                                                                                                                                                                                                                                                                                                                                                                                                                                                                                                                                                                                                                                                                                                                                                                                                                                                                                                                |               |
|-----------------------|----------------------------------------------------------------------------------------------------------------------------------------------------------------------------------------------------------------------------------------------------------------------------------------------------------------------------------------------------------------------------------------------------------------------------------------------------------------------------------------------------------------------------------------------------------------------------------------------------------------------------------------------------------------------------------------------------------------------------------------------------------------------------------------------------------------------------------------------------------------------------------------------------------------------------------------------------------------------------------------------------------------------------------------------------------------------------------------------------------------------------------------------------------------------------------------------------------------------------------------------------------------------------------------------------------------|---------------|
| <b>Web of Science</b> | (((((((((((((((((((TI=(Parkinson disease )) OR TI=(Parkinson's disease )) OR TS=(Movement disorders )) OR ALL=(Parkin*)) AND ALL=(Tele*)) OR TS=(Digital health )) OR TS=(Mobile health )) OR TS=(eHealth )) OR TS=(Sensors )) OR TS=(Home based care )) OR TS=(Telemetry )) OR TI=(Virtual consultations )) AND TI=(self-efficacy )) OR TI=(self-efficacy )) OR TI=(self management )) OR TI=(self-management )) OR TS=(Patient activation level )) OR TS=(Behavior change )) OR TS=(Behaviour change )) OR TS=(Behaviour modification )) OR TS=(Behavior modification )                                                                                                                                                                                                                                                                                                                                                                                                                                                                                                                                                                                                                                                                                                                                      | <b>2,651</b>  |
| <b>Embase</b>         | #1 Parkinson disease/or Parkin/or Parkin*.mp.<br>#2 Parkinson's disease.mp. or exp Parkinson disease/<br>#3 controlled study/exp Parkinson disease/ or exp levodopa/or Parkinson disease*.mp.<br>#4 Movement disorders.mp. exp motor dysfunction/<br>#5 1 or 2 or 3 or 4 <b>AND</b><br>#6 telecommunication/or Tele*.mp. or telemedicine/<br>#7 telemedicine.mp. or telemedicine robot/ or telecommunication/or telemedicine/ or healthcare delivery /or patient/<br>#8 telehealth.mp.or telecommunication/ or telehealth/or health care/or telemedicine<br>#9 telecare.mp. or exp telecare/<br>#10 exp medical informatics/ or digital health.mp.<br>#11 eHealth.mp./exp telehealth/<br>#12 mHealth.mp.or mobile health application/<br>#13 6 or 7 or 8 or 9 or 10 or 11 or 12 <b>AND</b><br>#14 exp self care / or self medication/or exp self concept/exp self-testing/ or self evaluation/ exp self-monitoring/or General self-efficacy scale/ or exp self help/ or self*.mp. or exp self report/ or self esteem/ or self-help device/ or Self-rating Depression Scale/<br>#15 self management.mp. or exp self care/<br>#16 self-efficacy.mp. or exp self concept<br>#17 behavior*.mp. or exp behaviour modification/or exp care behavior<br>#18 14 or 15 or 16 or 17<br>#19 5 <b>AND</b> 13 <b>AND</b> 18 | <b>3, 136</b> |
| <b>IEEE Xplore</b>    | ("Mesh_Terms":Parkin*) OR ("All Metadata":Parkinson's disease ) OR ("All Metadata":Neurodegenerative disorders ) OR ("All Metadata":Idiopathic Parkinson's Disease ) <b>AND</b> ("Mesh_Terms":Tele*) OR ("All Metadata":Digital Health) OR ("All Metadata":Mobile Health ) <b>AND</b> ("Mesh Terms":Self*) OR ("All Metadata":Self.                                                                                                                                                                                                                                                                                                                                                                                                                                                                                                                                                                                                                                                                                                                                                                                                                                                                                                                                                                            | <b>3195</b>   |

|                 |                                                                                                                                       |      |
|-----------------|---------------------------------------------------------------------------------------------------------------------------------------|------|
|                 | concept ) OR ("All Metadata":self, rehabilitation )<br>OR ("All Metadata": Self-management)                                           |      |
| Google Scholar™ | Parkinsonian disorders   Telemedicine Self-efficacy<br>Self-management<br><br>No Boolean operators used<br>Filtered by date-2012-2022 | 2210 |
